# Supplementary material
Source: Springer Nature journal article supplement (https://www.springermedizin.de/resource/supplementary/13058_2011_3029_MOESM11_ESM.pdf/9702904)

**a**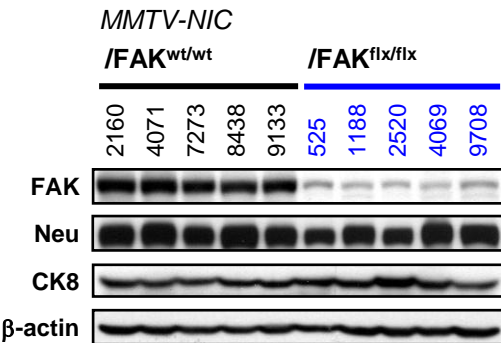**b**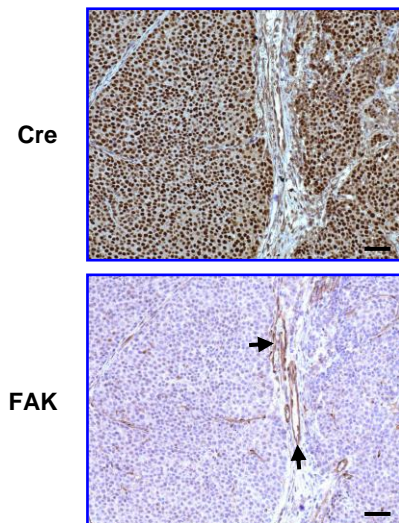**c**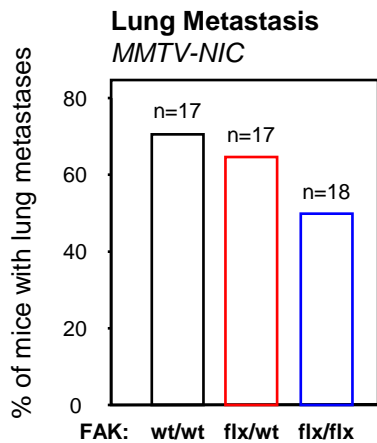**d**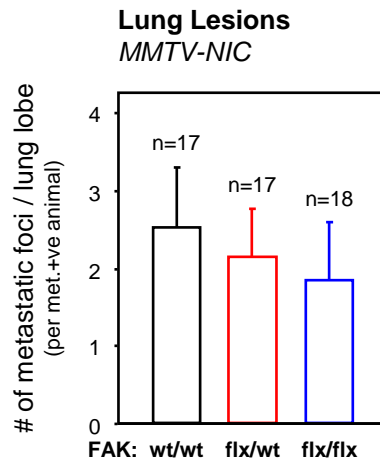

Supplement: MOESM11 [file 9702904]
